# Supplementary material for: Bisphenol-A Affects Male Fertility via Fertility-related Proteins in Spermatozoa
Source: PubMed Central journal article supplement (PMC4360475; doi:10.1038/srep09169), 2015-03-16
Supplement: srep09169-s1.pdf [file srep09169-s1.pdf]

**Supplemental Material for: Rahman *et al.***

(Title)

**Bisphenol-A Affects Male Fertility via Fertility-related Proteins in Spermatozoa**

**Md Saidur Rahman, Woo-Sung Kwon, June-Sub Lee, Sung-Jae Yoon, Buom-Yong Ryu,  
and Myung-Geol Pang**

**Department of Animal Science and Technology, Chung-Ang University, Anseong,  
Gyeonggi-do 456-756, Republic of Korea**

**Running title: Bisphenol-A Suppresses Male Fertility *In Vitro***

### **Supplementary Figure Legends:**

**Figure S1.** Differences in sperm motility with 100  $\mu\text{M}$  of BPA compare to control in different time of exposure. Data are presented as mean  $\pm$  SEM (4 replicates). Student's two-tailed  $t$ -test and one-way ANOVA were performed to determine the significance of differences between and within groups, respectively. Values with asterisks (\*) indicate significant difference between the control and treatment groups.

**Figure S2.** Effect of bisphenol-A (BPA) on intracellular ROS levels in spermatozoa. Differences in ROS levels between the control and BPA-treated samples. Data are presented as mean  $\pm$  SEM (4 replicates).

## Supplementary Figures

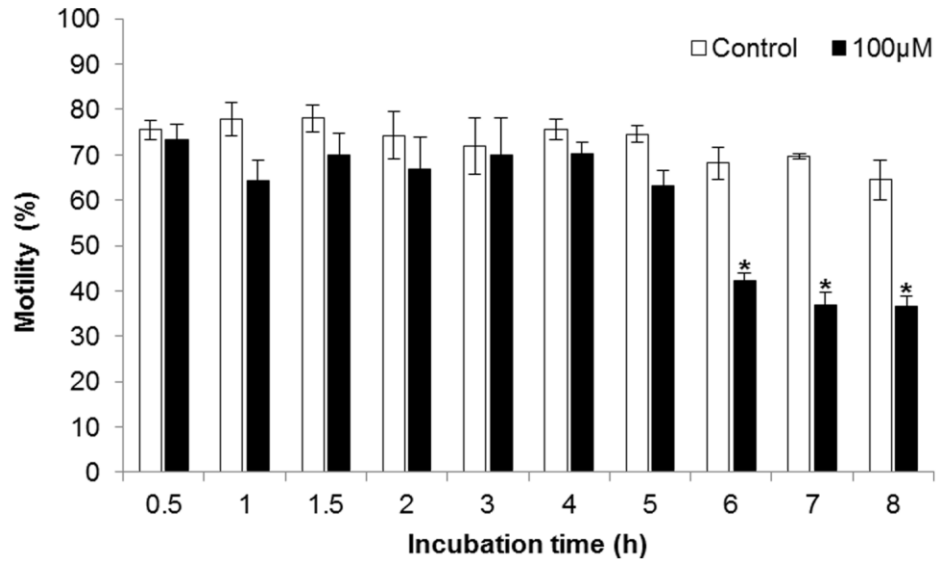

Supplementary Figure-S1

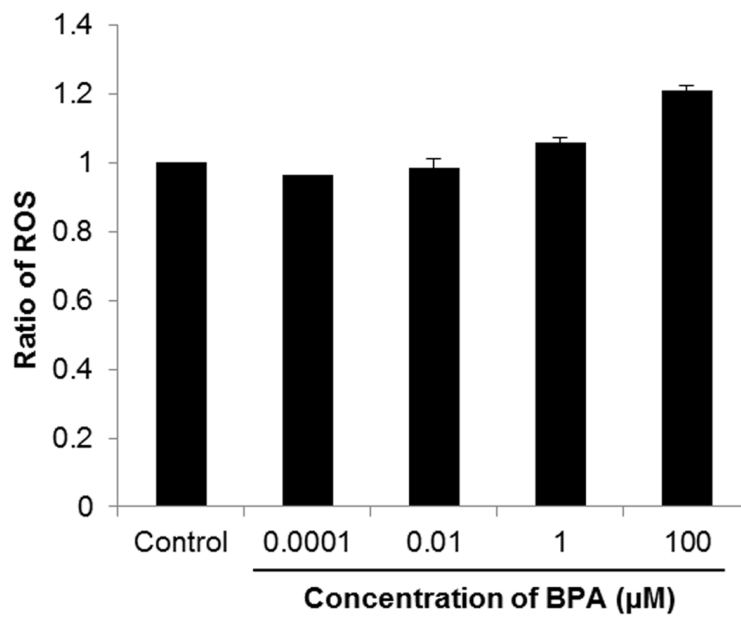

**Supplementary Figure-S2**
